# Supplementary material for: Effects of Ginger Phenylpropanoids and Quercetin on Nrf2-ARE Pathway in Human BJ Fibroblasts and HaCaT Keratinocytes
Source: Hindawi journal article supplement (doi:10.1155/2016/2173275), 2016-01-01
Supplement: f1 [file 2173275.f1.pdf]

## Supplementary material

Supplementary material includes a supplementary figure. The supplementary figure shows data on GSTP1 expression in controls of BJ fibroblasts and HaCaT cells.

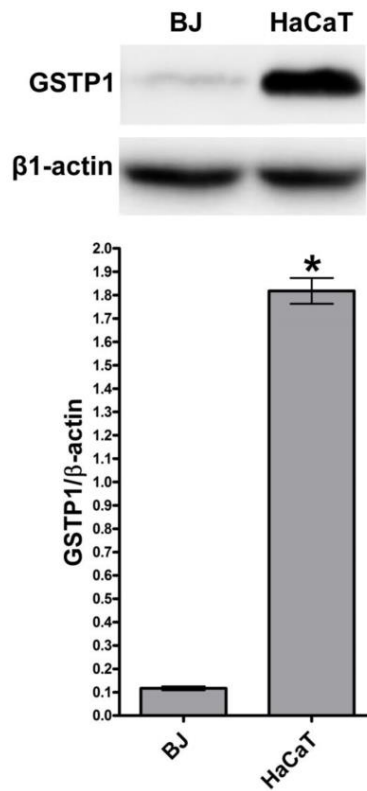

SUPPLEMENTARY FIGURE 1: Western blot analysis of GSTP1 protein expression in controls of HaCaT and BJ cells. In the graph, \* denotes statistically significant higher value from that of BJ controls ( $p < 0.05$ ). Western blots were done as three biological replicates.
